# Supplementary material for: Micron-Sized Silica-PNIPAM Core-Shell Microgels with Tunable Shell-To-Core Ratio
Source: Gels. 2022 Aug 18;8(8):516. doi: 10.3390/gels8080516 (PMC9407347; doi:10.3390/gels8080516)
Supplement: Supplementary file 1 [file gels-08-00516-s001.zip]

Archive with 4 entries (4 files):
- kuk-etal-concentrated.avi
- kuk-etal-dilute.avi
- kuk-etal-SI-revised.pdf
- MultireactorHolder-SmallScale-PETG.stl
